# Supplementary material
Source: PubMed Central journal article supplement (PMC9764228)
Supplement: NIHMS1528107-supplement-1.pdf [file NIHMS1528107-supplement-1.pdf]

**Supplemental Table 1. Patient characteristics of those who attended vs. not attended alcohol rehabilitation**

|                                                       | Test cohort             |                                              |                                                        |      | Validation cohort         |                                              |                                                        |              |
|-------------------------------------------------------|-------------------------|----------------------------------------------|--------------------------------------------------------|------|---------------------------|----------------------------------------------|--------------------------------------------------------|--------------|
|                                                       | All patients<br>(n=135) | Attended alcohol<br>rehabilitation<br>(n=27) | Did not attend<br>alcohol<br>rehabilitation<br>(n=108) | P*   | All patients**<br>(n=119) | Attended alcohol<br>rehabilitation<br>(n=19) | Did not attend<br>alcohol<br>rehabilitation<br>(n=100) | P***         |
| Age, years<br>(mean±SD)                               | 48.0±10.2               | 47.6±12.1                                    | 48.1±9.7                                               | 0.84 | 50.0±11.0                 | 44.7±11.3                                    | 51.7±11.3                                              | <b>0.02</b>  |
| Male (n, %)                                           | 90 (66.7%)              | 17 (63.0%)                                   | 73 (67.6%)                                             | 0.65 | 72 (60.5%)                | 10 (52.6%)                                   | 62 (62%)                                               | 0.44         |
| Married or living<br>with significant other<br>(n, %) | 42 (31.1%)              | 8 (29.6%)                                    | 19 (70.4%)                                             | 0.85 | 43 (39.5%)                | 9 (52.9%)                                    | 34 (37.0%)                                             | 0.22         |
| College degree or<br>above (n, %)                     | n/a                     | n/a                                          | n/a                                                    |      | 53 (48.6%)                | 14 (82.4%)                                   | 39 (42.4%)                                             | <b>0.003</b> |
| Average number of<br>drinks/day<br>(median, IQR)      | n/a                     | n/a                                          | n/a                                                    |      | 8 (5, 13)                 | 8 (5, 20)                                    | 7 (5, 12)                                              | 0.46         |
| Hepatic<br>decompensation (n,<br>%)                   | 49 (36.3%)              | 39 (36.1%)                                   | 10 (37.0%)                                             | 0.93 | 76 (63.9%)                | 13 (68.4%)                                   | 63 (63.0%)                                             | 0.65         |
| - Hepatic<br>encephalopathy (n,<br>%)                 | 17 (12.6%)              | 3 (11.1%)                                    | 14 (13.6%)                                             | 1.00 | 25 (21.0%)                | 3 (15.8%)                                    | 22 (22.0%)                                             | 0.76         |
| - Variceal bleeding<br>(n, %)                         | 3 (2.2%)                | 0 (0%)                                       | 3 (2.8%)                                               | 1.00 | 20 (16.8%)                | 4 (21.1%)                                    | 16 (16.0%)                                             | 0.52         |
| - Ascites (n, %)                                      | 53 (39.3%)              | 12 (44.4%)                                   | 41 (38.0%)                                             | 0.54 | 65 (54.6%)                | 13 (68.4%)                                   | 52 (52%)                                               | 0.19         |
| <b>Severity scores</b>                                |                         |                                              |                                                        |      |                           |                                              |                                                        |              |
| MELD score<br>(mean±SD)                               | 20.5±7.2                | 22.6±8.9                                     | 20.0±6.6                                               | 0.17 | 21.8±7.2                  | 21.8±5.8                                     | 21.6±7.2                                               | 0.88         |
| CTP score<br>(mean±SD)                                | 8.9±1.5                 | 8.9±1.7                                      | 8.9±1.5                                                | 0.87 | 9.5±1.8                   | 9.5±1.9                                      | 9.4±1.7                                                | 0.84         |
| mDF score (median,<br>IQR)                            | 30 (16, 50)             | 28 (19, 65)                                  | 31 (16, 49)                                            | 0.40 | 37 (15, 61)               | 41 (15, 69)                                  | 34 (15, 59)                                            | 0.46         |
| mDF score≥32 (n,<br>%)                                | 64 (49.2%)              | 12 (46.2%)                                   | 52 (50.0%)                                             | 0.73 | 64 (54.2%)                | 11 (57.9%)                                   | 53 (53.5%)                                             | 0.73         |

| <b>Outcomes</b>                      |            |            |            |             |           |           |           |      |
|--------------------------------------|------------|------------|------------|-------------|-----------|-----------|-----------|------|
| Hospital stay, days (median, IQR)    | 7 (4, 12)  | 7 (4, 14)  | 6 (4,10)   | 0.35        | 6 (3, 10) | 6 (3, 13) | 7 (3, 10) | 0.56 |
| Addiction medicine consult attempt   | 96 (71.1%) | 22 (81.5%) | 74 (68.5%) | 0.18        | n/a       | n/a       | n/a       |      |
| Addiction medicine consult completed | 87 (64.4%) | 22 (81.5%) | 65 (60.2%) | <b>0.04</b> | n/a       | n/a       | n/a       |      |

\*P-value comparing those who readmitted vs. who did not readmit in test cohort

\*\*Validation cohort in this table only include patients with available alcohol rehabilitation data

\*\*\*P-value comparing those who readmitted vs. who did not readmit in validation cohort

n/a = data not available

**Supplemental Table 2. Univariate logistic regression analysis for predictors of alcohol rehabilitation attendance**

| Variables                                | Test cohort      |             | Validation cohort |              |
|------------------------------------------|------------------|-------------|-------------------|--------------|
|                                          | Odds ratio       | P           | Odds ratio        | P            |
| Age (per 1 year)                         | 0.99 (0.95-1.04) | 0.81        | 0.95 (0.90-0.99)  | <b>0.01</b>  |
| Male                                     | 0.82 (0.34-1.96) | 0.65        | 0.68 (0.45-0.25)  | 0.45         |
| BMI                                      | 0.97 (0.91-1.03) | 0.32        | 1.04 (0.97-1.12)  | 0.27         |
| White                                    | n/a*             |             | 0.80 (0.20-3.12)  | 0.75         |
| Married or living with significant other | 0.92 (0.37-2.30) | 0.85        | 1.92 (0.68-5.44)  | 0.22         |
| College degree or above                  | n/a              |             | 6.34 (1.70-23.6)  | <b>0.002</b> |
| Average number of drinks/day             | n/a              |             | 1.02 (0.96-1.08)  | 0.57         |
| Hepatic decompensation                   | 1.04 (0.43-2.95) | 0.93        | 1.27 (0.45-3.63)  | 0.65         |
| Hepatic encephalopathy                   | 0.84 (0.22-3.16) | 0.79        | 0.66 (0.18-2.49)  | 0.53         |
| Variceal bleeding                        | n/a*             |             | 1.40 (0.41-4.77)  | 0.59         |
| Ascites                                  | 1.31 (0.56-3.07) | 0.54        | 2.0 (0.70-5.68)   | 0.18         |
| Platelet                                 | 1.00 (0.99-1.00) | 0.77        | 1.00 (0.99-1.01)  | 0.90         |
| Albumin                                  | 1.41 (0.64-3.11) | 0.39        | 1.86 (0.98-3.52)  | 0.05         |
| Creatinine                               | 1.63 (1.05-2.51) | <b>0.02</b> | 0.59 (0.19-1.82)  | 0.25         |
| Total bilirubin                          | 1.11 (0.34-3.64) | 0.86        | 1.01 (0.96-1.06)  | 0.68         |
| INR                                      | 1.40 (0.71-2.78) | 0.34        | 1.27 (0.53-3.05)  | 0.59         |
| PT                                       | 1.01 (0.92-1.01) | 0.86        | 1.03 (0.94-1.13)  | 0.52         |
| MELD score                               | 1.05 (0.99-1.08) | 0.10        | 1.00 (0.94-1.08)  | 0.89         |
| Child-Turcotte-Pugh Score                | 0.97 (0.73-1.30) | 0.85        | 1.04 (0.77-1.39)  | 0.82         |
| mDF score                                | 1.01 (0.99-1.02) | 0.47        | 1.01 (0.99-1.02)  | 0.49         |
| mDF score $\geq 32$                      | 0.86 (0.36-2.03) | 0.73        | 1.19 (0.44-3.22)  | 0.73         |
| ABIC score                               | 1.17 (0.88-1.55) | 0.29        | 0.66 (0.43-1.01)  | 0.05         |
| Addiction medicine consult completed     | 2.91 (1.02-8.27) | <b>0.03</b> | n/a               |              |
| Addiction medicine consult attempt       | 2.02 (0.71-5.79) | 0.17        | n/a               |              |

n/a\* = not enough data for analysis (only 5 patients who were non-white and only 3 patients with variceal bleeding in test cohort)

n/a = data not available

**Supplemental Table 3. Multivariate logistic regression analysis for predictors of alcohol rehabilitation attendance**

| Variables                            | Test cohort      |      | Validation cohort |             |
|--------------------------------------|------------------|------|-------------------|-------------|
|                                      | Odds ratio       | P    | Odds ratio        | P           |
| Age (per 1 year)                     | n/a              |      | 0.95 (0.90-1.00)  | 0.05        |
| College degree or above              | n/a              |      | 4.62 (1.19-17.9)  | <b>0.03</b> |
| Creatinine                           | 1.53 (0.99-2.37) | 0.06 | n/a               |             |
| Addiction medicine consult completed | 2.55 (0.88-7.37) | 0.08 | n/a               |             |

**Supplemental Table 4. Univariate logistic regression analysis for predictors of 30-day readmission**

| Variables                                | Test cohort      |              | Validation cohort |             |
|------------------------------------------|------------------|--------------|-------------------|-------------|
|                                          | Odds ratio       | P            | Odds ratio        | P           |
| Age (per 1 year)                         | 0.99 (0.95-1.03) | 0.53         | 0.98 (0.95-1.01)  | 0.21        |
| Male                                     | 1.31 (0.59-2.90) | 0.51         | 1.08 (0.55-2.14)  | 0.82        |
| BMI                                      | 1.00 (0.95-1.05) | 0.85         | 0.98 (0.93-1.03)  | 0.36        |
| White                                    | 0.64 (0.10-4.00) | 0.64         | 0.75 (0.29-1.92)  | 0.55        |
| Married or living with significant other | 1.22 (0.56-2.67) | 0.62         | 1.32 (0.65-2.66)  | 0.44        |
| College degree or above                  | n/a              |              | 1.23 (0.61-2.47)  | 0.56        |
| Average number of drinks/day             | n/a              |              | 0.95 (0.85-1.07)  | 0.41        |
| Hepatic decompensation                   | 2.87 (1.34-6.14) | <b>0.006</b> | 1.37 (0.66-2.86)  | 0.40        |
| Hepatic encephalopathy                   | 1.73 (0.61-4.92) | 0.30         | 0.68 (0.30-1.54)  | 0.36        |
| Variceal bleeding                        | 4.77 (0.42-54.1) | 0.21         | 1.15 (0.45-2.89)  | 0.77        |
| Ascites                                  | 1.76 (0.84-3.71) | 0.14         | 1.16 (0.59-2.31)  | 0.66        |
| Platelet                                 | 1.01 (0.99-1.01) | 0.08         | 1.00 (0.99-1.00)  | 0.73        |
| Albumin                                  | 0.60 (0.30-1.19) | 0.14         | 0.73 (0.43-1.23)  | 0.22        |
| Creatinine                               | 0.78 (0.47-1.30) | 0.31         | 1.14 (0.79-1.64)  | 0.48        |
| Total bilirubin                          | 1.04 (1.01-1.08) | <b>0.009</b> | 1.01 (0.98-1.04)  | 0.51        |
| INR                                      | 1.52 (0.65-3.55) | 0.34         | 1.27 (0.69-2.33)  | 0.45        |
| PT                                       | 1.02 (0.94-1.10) | 0.64         | 1.04 (0.98-1.11)  | 0.20        |
| MELD score                               | 1.03 (0.98-1.08) | 0.23         | 1.04 (0.99-1.09)  | 0.09        |
| Child-Turcotte-Pugh score                | 1.26 (0.97-1.62) | 0.08         | 1.18 (0.96-1.44)  | 0.10        |
| mDF score                                | 1.01 (1.00-1.02) | 0.14         | 1.01 (0.99-1.02)  | 0.29        |
| mDF score $\geq 32$                      | 2.18 (1.02-4.68) | <b>0.04</b>  | 1.63 (0.81-3.29)  | 0.17        |
| ABIC score                               | 1.11 (0.86-1.43) | 0.41         | 0.97 (0.75-1.26)  | 0.82        |
| Attendance to alcohol rehabilitation     | 0.23 (0.07-0.81) | <b>0.02</b>  | 0.33 (0.10-0.99)  | <b>0.04</b> |

n/a = data not available in test cohort

**Supplemental Table 5. Univariate logistic regression analysis for predictors of 30-day alcohol relapses**

| Variables                                | Test cohort       |              | Validation cohort |              |
|------------------------------------------|-------------------|--------------|-------------------|--------------|
|                                          | Odds ratio        | P            | Odds ratio        | P            |
| Age (per 1 year)                         | 1.00 (0.97-1.04)  | 0.91         | 1.01 (0.98-1.04)  | 0.47         |
| Male                                     | 0.54 (0.26-1.13)  | 0.10         | 0.95 (0.89-0.47)  | 0.89         |
| BMI                                      | 0.99 (0.95-1.04)  | 0.82         | 0.99 (0.95-1.04)  | 0.82         |
| White                                    | n/a*              |              | 0.54 (0.19-1.49)  | 0.24         |
| Married or living with significant other | 1.07 (0.50-2.7)   | 0.86         | 0.62 (0.29-1.33)  | 0.22         |
| College degree or above                  | n/a**             |              | 0.45 (0.21-0.95)  | <b>0.04</b>  |
| Average number of drinks/day             | n/a**             |              | 0.99 (0.95-1.03)  | 0.54         |
| Hepatic decompensation                   | 0.64 (0.31-1.35)  | 0.24         | 1.20 (0.64-0.56)  | 0.64         |
| Hepatic encephalopathy                   | 0.48 (0.15-1.57)  | 0.20         | 0.48 (0.15-1.57)  | 0.20         |
| Variceal bleeding                        | n/a*              |              | 1.78 (0.71-4.47)  | 0.22         |
| Ascites                                  | 0.61 (0.29-1.27)  | 0.18         | 0.75 (0.37-1.51)  | 0.42         |
| Platelet                                 | 1.00 (0.99-1.00)  | 0.83         | 0.99 (0.99-1.00)  | 0.41         |
| Albumin                                  | 2.51 (1.24-5.08)  | <b>0.01</b>  | 1.20 (0.74-1.96)  | 0.46         |
| Creatinine                               | 0.52 (0.27-0.98)  | <b>0.02</b>  | 1.01 (0.66-1.53)  | 0.97         |
| Total bilirubin                          | 0.97 (0.93-1.00)  | 0.05         | 0.95 (0.91-0.99)  | <b>0.004</b> |
| INR                                      | 0.33 (0.12-0.91)  | <b>0.02</b>  | 0.43 (0.20-0.91)  | <b>0.02</b>  |
| PT                                       | 0.89 (0.81-0.98)  | <b>0.01</b>  | 0.91 (0.84-0.98)  | <b>0.007</b> |
| MELD score                               | 0.93 (0.87-0.99)  | <b>0.01</b>  | 0.92 (0.87-0.98)  | <b>0.005</b> |
| Child-Turcotte-Pugh Score                | 0.76 (0.359-0.97) | <b>0.03</b>  | 0.78 (0.63-0.97)  | <b>0.02</b>  |
| mDF score                                | 0.98 (0.97-0.99)  | <b>0.02</b>  | 0.98 (0.97-0.99)  | <b>0.003</b> |
| mDF score $\geq 32$                      | 0.80 (0.39-1.65)  | 0.55         | 0.36 (0.17-0.73)  | <b>0.005</b> |
| ABIC score                               | 0.80 (0.62-1.02)  | 0.07         | 0.82 (0.62-1.09)  | 0.16         |
| Attendance to alcohol rehabilitation     | 0.10 (0.02-0.44)  | <b>0.002</b> | 0.07 (0.08-0.51)  | <b>0.009</b> |

n/a\* = not enough data for analysis (only 5 patients who were non-white and only 3 patients with variceal bleeding in test cohort)

n/a\*\* = data not available in test cohort

**Supplemental Table 6. Univariate Cox regression analysis for predictors of mortality**

| Variables                                | Test cohort        |              | Validation cohort |                  |
|------------------------------------------|--------------------|--------------|-------------------|------------------|
|                                          | Hazard ratio       | P            | Hazard ratio      | P                |
| Age (per 1 year)                         | 1.01 (0.98-1.04)   | 0.44         | 1.06 (1.03-1.09)  | <b>&lt;0.001</b> |
| Male                                     | 0.88 (0.51-1.55)   | 0.66         | 0.87 (0.45-1.75)  | 0.69             |
| BMI                                      | 1.00 (0.97-1.04)   | 0.80         | 0.98 (0.94-1.03)  | 0.46             |
| White                                    | 0.79 (0.24-4.84)   | 0.74         | 2.17 (0.79-8.97)  | 0.20             |
| Married or living with significant other | 0.60 (0.29-1.23)   | 0.13         | 1.37 (0.71-2.62)  | 0.34             |
| College degree or above                  | n/a                |              | 0.81 (0.41-1.55)  | 0.52             |
| Average number of drinks/day             | n/a                |              | 0.99 (0.95-1.03)  | 0.60             |
| Hepatic decompensation                   | 1.16 (0.66-2.00)   | 0.59         | 2.05 (1.02-4.56)  | <b>0.04</b>      |
| Hepatic encephalopathy                   | 0.87 (0.36-1.81)   | 0.72         | 1.39 (0.68-2.65)  | 0.35             |
| Variceal bleeding                        | 12.32 (2.92-35.44) | <b>0.002</b> | 1.25 (0.56-2.51)  | 0.56             |
| Ascites                                  | 0.90 (0.51-1.56)   | 0.72         | 1.51 (0.81-2.90)  | 0.20             |
| Platelet                                 | 0.99 (0.99-1.00)   | 0.25         | 0.99 (0.99-1.00)  | 0.37             |
| Albumin                                  | 0.82 (0.48-1.39)   | 0.47         | 0.88 (0.55-1.34)  | 0.57             |
| Creatinine                               | 0.75 (0.45-1.12)   | 0.22         | 0.93 (0.56-1.25)  | 0.69             |
| Total bilirubin                          | 1.00 (0.97-1.02)   | 0.99         | 0.98 (0.95-1.02)  | 0.36             |
| INR                                      | 1.59 (0.84-2.81)   | 0.13         | 1.41 (0.80-2.36)  | 0.21             |
| PT                                       | 1.05 (0.99-1.10)   | 0.05         | 1.02 (0.97-1.08)  | 0.40             |
| MELD score                               | 1.00 (0.96-1.04)   | 0.93         | 1.00 (0.96-1.04)  | 0.93             |
| Child-Turcotte-Pugh Score                | 1.09 (0.91-1.32)   | 0.34         | 1.16 (0.96-1.40)  | 0.12             |
| mDF score                                | 1.01 (1.00-1.01)   | 0.23         | 1.00 (0.99-1.01)  | 0.66             |
| mDF score $\geq$ 32                      | 1.47 (0.85-2.57)   | 0.17         | 1.21 (0.66-2.26)  | 0.53             |
| ABIC score                               | 1.02 (0.85-1.22)   | 0.82         | 1.42 (1.13-1.78)  | <b>0.002</b>     |
| Attendance to alcohol rehabilitation     | 0.20 (0.05-0.55)   | <b>0.001</b> | 0.15 (0.01-0.68)  | <b>0.009</b>     |

n/a = data not available in test cohort
